# Supplementary material
Source: PubMed Central journal article supplement (PMC6760671)
Supplement: NIHMS1526841-supplement-Supplemental_material.pdf [file NIHMS1526841-supplement-Supplemental_material.pdf]

# Supplementary Material\*

Nichols HB, Schoemaker MJ, Cai J, Xu J, Wright LB, Brook MN, et al. Breast cancer risk after recent childbirth. A pooled analysis of 15 prospective studies. *Ann Intern Med.* 2018. doi:10.7326/M18-1323

- Investigator list.** ..... 2
- Statistical methods supplement.** ..... 4
- Supplement Figure 1.** Flowchart of exclusions from analysis based on analysis eligibility criteria and censoring during follow-up ..... 8
- Supplement Figure 2.** Forest plot of the association between time since most recent birth and breast cancer risk by study, adjusted for parity (continuous). ..... 9
- Supplement Figure 3.** Directed acyclic graph for the association between time since most recent birth and breast cancer ..... 10
- Supplement Figure 4.** Cumulative hazard for breast cancer according time since most recent birth, adjusted for parity. 11
- Supplement Figure 5.** Cumulative hazard for breast cancer according to time since most recent birth, adjusted for parity and standardized to a common age interval ..... 12
- Supplement Figure 6.** Hazard ratio (HR) for breast cancer risk according to years since most recent birth and stratified according to family history of breast cancer ..... 13
- Supplement Figure 7.** Hazard ratio (HR) for breast cancer risk according to years since most recent birth and stratified by breastfeeding history. .... 14
- Supplement Figure 8.** Hazard ratio (HR) for ER-positive and ER-negative breast cancer risk according to years since most recent birth, additionally adjusted for breastfeeding status..... 15
- Supplement Table 1.** Cohort-specific study characteristics ..... 16
- Supplement Table 2.** Multivariable hazard ratio (HR) and 95% confidence intervals (CI) for the association between time since most recent birth and ER-negative breast cancer risk according to breastfeeding history . ..... 18
- Supplement Table 3.** Multivariable hazard ratios (HR) and 95% confidence intervals (CI) for the association between between time since last birth and breast cancer risk overall, and according to estrogen receptor (ER) status, among parous women. .... 19
- Supplement Table 4.** Multivariable hazard ratio (HR) and 95% confidence intervals (CI) for the association between time since most recent birth and breast cancer risk according to stage at diagnosis ..... 20

## Investigator list.

Hazel B. Nichols, PhD <sup>1\*</sup>, Minouk J. Schoemaker, PhD <sup>2\*</sup>, Jianwen Cai, PhD <sup>3</sup>, Jiawei Xu, BS <sup>3</sup>, Lauren B. Wright, MSc <sup>2</sup>, Mark N. Brook, PhD <sup>2</sup>, Michael E. Jones, PhD <sup>2</sup>, Hans-Olov Adami, MD, PhD <sup>4</sup>, Laura Baglietto, PhD <sup>5</sup>, Kimberly A. Bertrand, ScD <sup>6</sup>, William J. Blot, PhD <sup>7</sup>, Marie-Christine Boutron-Ruault, MD, PhD <sup>8</sup>, Miren Dorronsoro, MD <sup>9</sup>, Laure Dossus, PhD <sup>10</sup>, A. Heather Eliassen, ScD <sup>11</sup>, Graham G. Giles, PhD <sup>12,13</sup>, Inger T. Gram, MD, PhD <sup>14</sup>, Susan E. Hankinson, ScD <sup>15</sup>, Judy Hoffman-Bolton, AA <sup>16</sup>, Rudolf Kaaks, PhD <sup>17</sup>, Timothy J. Key, DPhil <sup>18</sup>, Cari M. Kitahara, PhD <sup>19</sup>, Susanna C. Larsson, PhD <sup>20</sup>, Martha Linet, MD <sup>19</sup>, Melissa A. Merritt, PhD <sup>21</sup>, Roger L. Milne, PhD <sup>12,13</sup>, Valeria Pala, DrSc <sup>22</sup>, Julie R. Palmer, ScD <sup>6</sup>, Petra H. Peeters, MD, PhD <sup>23</sup>, Elio Riboli, MD <sup>21</sup>, Malin Sund, MD, PhD <sup>24</sup>, Rulla M. Tamimi, ScD <sup>11</sup>, Anne Tjønneland, MD, PhD, DMSc <sup>25</sup>, Antonia Trichopoulou, MD, PhD <sup>26</sup>, Giske Ursin, MD <sup>27</sup>, Lars Vatten, MD, PhD <sup>27</sup>, Kala Visvanathan, MD <sup>16,28</sup>, Elisabete Weiderpass, MD, PhD <sup>4,14,29</sup>, Alicja Wolk, DrMedSc <sup>20</sup>, Wei Zheng, MD, PhD <sup>7</sup>, Clarice R. Weinberg, PhD <sup>30</sup>, Anthony J. Swerdlow, DM, DSc <sup>2,31†</sup>, Dale P. Sandler, PhD <sup>32†</sup>

\*Co-first authors

†Co-senior authors

### Affiliations (Institution, Country):

<sup>1</sup> University of North Carolina Gillings School of Global Public Health, Department of Epidemiology, USA

<sup>2</sup> Division of Genetics and Epidemiology, The Institute of Cancer Research, London, UK

<sup>3</sup> University of North Carolina Gillings School of Global Public Health, Department of Biostatistics, USA

<sup>4</sup> Department of Medical Epidemiology and Biostatistics (MEB), Karolinska Institutet, Stockholm, Sweden

<sup>5</sup> Department of Clinical and Experimental Medicine, University of Pisa, Italy

<sup>6</sup> Slone Epidemiology Center at Boston University, USA

<sup>7</sup> Division of Epidemiology, Department of Medicine, Vanderbilt-Ingram Cancer Center, Vanderbilt University School of Medicine, USA

<sup>8</sup> Inserm U1018, Institut Gustave Roussy, CESP and University Paris-Saclay, University Paris-Sud, Villejuif, France

<sup>9</sup> Public Health Direction and Biodonostia Research Institute and Ciberesp, Basque Regional Health Department, Spain

<sup>10</sup> International Agency for Research on Cancer, France

<sup>11</sup> Channing Division of Network Medicine, Brigham and Women's Hospital and Harvard Medical School, USA; Harvard T.H. Chan School of Public Health, USA

<sup>12</sup> Cancer Epidemiology & Intelligence Division, Cancer Council Victoria, Melbourne, Australia

<sup>13</sup> Centre for Epidemiology and Biostatistics, School of Population and Global Health, The University of Melbourne, Melbourne, Australia

<sup>14</sup> Department of Community Medicine, University of Tromsø, The Arctic University of Norway, Tromsø, Norway

<sup>15</sup> Department of Biostatistics and Epidemiology, School of Public Health and Health Sciences, University of Massachusetts, Amherst, USA

<sup>16</sup> Johns Hopkins Bloomberg School of Public Health, USA

<sup>17</sup> Division of Cancer Epidemiology, DKFZ, Heidelberg, Germany

<sup>18</sup> University of Oxford, UK

<sup>19</sup> Radiation Branch, Division of Cancer Epidemiology and Genetics, National Cancer Institute, National Institutes of Health, USA

<sup>20</sup> Karolinska Institutet, Institute of Environmental Medicine, Sweden

<sup>21</sup> School of Public Health, Imperial College London, UK

<sup>22</sup> Cancer Registry of Norway, Institute of Population-Based Cancer Research and Norway and Institute of Basic Medical Sciences, University of Oslo, Oslo, Norway and Department of Preventive Medicine, University of Southern California, USA

<sup>23</sup> University Medical Center, Utrecht, Netherlands

<sup>24</sup> Department of Surgical and Perioperative Sciences, Umeå University, Sweden

<sup>25</sup> Danish Cancer Society Research Centre, Copenhagen, Denmark

<sup>26</sup> Hellenic Health Foundation, Greece

<sup>27</sup> Norwegian University of Science and Technology, Norway

<sup>28</sup> Johns Hopkins School of Medicine, USA

<sup>29</sup> Genetic Epidemiology Group, Folkhälsan Research Center, Helsinki, Finland

<sup>30</sup> Biostatistics and Computational Biology Branch, National Institute of Environmental Health Sciences, National Institutes of Health, USA

<sup>31</sup> Division of Breast Cancer Research, The Institute of Cancer Research, London, UK

<sup>32</sup> Epidemiology Branch, National Institute of Environmental Health Sciences, National Institutes of Health, USA

## Statistical methods supplement

### Allocation of person-time

Only person-time observed during follow-up was analyzed; women entered the analysis at the age they enrolled in the cohort. For example, if a women enrolled in a study cohort at age 50 and reported having a first child at age 28, a second child at age 30, a third child at age 34, first breastfeeding at age 30, having a family history of breast cancer, and did not develop breast cancer and was censored at age 54.9, her exposure status would appear as:

| Age interval | Parity indicator | Number of births | Time since most recent birth | Breastfeeding         | Family history of breast cancer |
|--------------|------------------|------------------|------------------------------|-----------------------|---------------------------------|
| 50.0-<51     | 1                | 3                | 16.5                         | Parous-ever breastfed | Yes                             |
| 51.0-<52     | 1                | 3                | 17.5                         | Parous-ever breastfed | Yes                             |
| 52.0-<53     | 1                | 3                | 18.5                         | Parous-ever breastfed | Yes                             |
| 53.0-<54     | 1                | 3                | 19.5                         | Parous-ever breastfed | Yes                             |
| 54.0-<55     | 1                | 3                | 20.5                         | Parous-ever breastfed | Yes                             |

### Analysis of time-varying exposures:

Time since most recent birth (years), parity (continuous number of births, 0-10), and breastfeeding status (nulliparous, parous-never breastfed, parous-breastfed) were analyzed as time-varying exposures. When time since most recent birth was modeled as a continuous spline variable, nulliparous women were assigned the value of 0 for the time since most recent birth variable and models contained an indicator variable for parity to allow the risk at 0 years since most recent birth for parous women to differ from that for nulliparous women. Time since most recent birth was reset to 0 at each additional birth reported during follow-up. Breastfeeding was analyzed as an absorbing state (i.e. once a woman was defined as breastfeeding she did not return to a nulliparous or parous-never breastfeeding state). Family history was also an absorbing state—women transitions from no family history to having a family history at the age they first reported having a first-degree family history of breast cancer.

For example, if a nulliparous woman enrolled in a study cohort at age 25.2 and had a first child at age 28, a second child at age 30, a third child at age 34, reported first breastfeeding at age 30, reported having a family history of breast cancer at age 35, and developed breast cancer at 38 her exposure status would appear as:

| Age interval | Parity indicator | Number of births | Time since most recent birth | Breastfeeding          | Family history of breast cancer |
|--------------|------------------|------------------|------------------------------|------------------------|---------------------------------|
| 25.2-<28     | 0                | 0                | Nulliparous                  | Nulliparous            | No                              |
| 28.0-<29     | 1                | 1                | 0.5                          | Parous-never breastfed | No                              |
| 29.0-<30     | 1                | 1                | 1.5                          | Parous-never breastfed | No                              |
| 30.0-<31     | 1                | 2                | 0.5                          | Parous-ever breastfed  | No                              |
| 31.0-<32     | 1                | 2                | 1.5                          | Parous-ever breastfed  | No                              |
| 32.0-<33     | 1                | 2                | 2.5                          | Parous-ever breastfed  | No                              |
| 33.0-<34     | 1                | 2                | 3.5                          | Parous-ever breastfed  | No                              |
| 34.0-<35     | 1                | 3                | 0.5                          | Parous-ever breastfed  | No                              |
| 35.0-<36     | 1                | 3                | 1.5                          | Parous-ever breastfed  | Yes                             |
| 36.0-<37     | 1                | 3                | 2.5                          | Parous-ever breastfed  | Yes                             |
| 37.0-<38     | 1                | 3                | 3.5                          | Parous-ever breastfed  | Yes                             |

### Frequency of updated exposure information

Each study contributed information from study enrollment and any available (at time of data delivery) follow-up rounds. The total number of questionnaires (including enrollment) with information available for each time-varying covariate is shown below:

| <b>Cohort</b>                                                                                | <b>Births</b> | <b>Breastfeeding</b> | <b>Family history of breast cancer</b> |
|----------------------------------------------------------------------------------------------|---------------|----------------------|----------------------------------------|
| Black Women's Health Study (21)                                                              | 9             | 8                    | 2                                      |
| Campaign against Cancer and Heart Disease (25)                                               | 3             | 2                    | 3                                      |
| European Prospective Investigation into Cancer and Nutrition (30) †                          | 2             | 1                    | Not available                          |
| Etude Epidémiologique auprès de femmes de la Mutuelle Générale de l'Education Nationale (22) | 1             | 2                    | 2                                      |
| Generations Study (33)                                                                       | 2             | 2                    | 1                                      |
| Helseundersøkelsen i Nord-Trøndelag (28)                                                     | 1             | Not available        | Not available                          |
| Melbourne Collaborative Cohort Study (26)                                                    | 2             | 2                    | 2                                      |
| Norwegian Women and Cancer Study (29)                                                        | 2             | 2                    | 2                                      |
| Nurses' Health Study (27)                                                                    | 6             | 1                    | 8                                      |
| Nurses' Health Study II (23)                                                                 | 11            | 8                    | 5                                      |
| Sister Study (34)                                                                            | 3             | 3                    | 1                                      |
| Southern Community Cohort Study (32)                                                         | 1             | 1                    | 1                                      |
| Sweden Women's Lifestyle and Health Study (31)                                               | 2             | 2                    | 1                                      |
| Swedish Mammography Cohort (35)                                                              | 2             | Not available        | 1                                      |
| United States Radiologic Technologist Cohort (24)                                            | 2             | Not available        | 2                                      |

### Timing of updated exposure information

Adjustment factors (e.g. parity, breastfeeding) reflect status at study enrollment, and at the ages parity and breastfeeding status changed, as reported during study follow-up. We evaluated two strategies for the timing of changes to exposure status:

- a) Exposure status changes at the age of subsequent follow-up. This strategy has the advantage of minimizing the potential for immortal person-time bias based on the requirement for women to survive (i.e. not develop breast cancer) to the age when the follow-up occurred, and has the disadvantage of inaccurately assigning person-time retrospectively (but not differentially by survival status). In this setting, a woman who enrolled in the study at age 33 and said she had one child at age 30; and who later completed a follow-up questionnaire at age 40 and said she had 3 children age at ages 30, 34, and 36; and then developed breast cancer at age 44; would have her parity exposure status updated 1 time at age 40 as follows:

| Age interval                                          | Parity | Time since most recent birth |
|-------------------------------------------------------|--------|------------------------------|
| 33-<34                                                | 1      | 3.5                          |
| 34-<35                                                | 1      | 4.5                          |
| 35-<36                                                | 1      | 5.5                          |
| 36-<37                                                | 1      | 6.5                          |
| 37-<38                                                | 1      | 7.5                          |
| 38-<39                                                | 1      | 8.5                          |
| 39-<40                                                | 1      | 9.5                          |
| 40*-<41                                               | 3      | 4.5                          |
| 41-<42                                                | 3      | 5.5                          |
| 42-<43                                                | 3      | 6.5                          |
| 43-<44                                                | 3      | 7.5                          |
| *Exposure status change at age 40 follow-up interview |        |                              |

b) **Exposure status changes at the age of reported births (retrospectively).** This strategy has the advantage of more accurately assigning person time based on the information available, but the disadvantage of allowing for potential immortal person-time bias as person time will be more accurately assigned for women who survive during follow-up to provide additional information. Using the same example of a woman who enrolled in the study at age 33 and said she had one child at age 30; and who later completed a follow-up questionnaire at age 40 and said she had 3 children age at ages 30, 34, and 36; and then developed breast cancer at age 44; parity exposure status would be updated twice at ages 34 and 36 as follows:

| Age interval                                                                                            | Parity | Time since most recent birth |
|---------------------------------------------------------------------------------------------------------|--------|------------------------------|
| 33-<34                                                                                                  | 1      | 3.5                          |
| 34*-<35                                                                                                 | 2      | 0.5                          |
| 35-<36                                                                                                  | 2      | 1.5                          |
| 36*-<37                                                                                                 | 3      | 0.5                          |
| 37-<38                                                                                                  | 3      | 1.5                          |
| 38-<39                                                                                                  | 3      | 2.5                          |
| 39-<40                                                                                                  | 3      | 3.5                          |
| 40-<41                                                                                                  | 3      | 4.5                          |
| 41-<42                                                                                                  | 3      | 5.5                          |
| 42-<43                                                                                                  | 3      | 6.5                          |
| 43-<44                                                                                                  | 3      | 7.5                          |
| *Exposure status changes made at ages of births reported retrospectively at age 40 follow-up interview. |        |                              |

Between these approaches, the overall pattern of the association was highly similar. The plot appeared to be shifted slightly upward when exposure time was assigned at the age of each birth. Therefore, we repeated analyses for cohorts with the most frequent follow-up as they would be the least sensitive to survival biases and/or inaccuracies in exposure information. The overall shape of the curve within these studies was most similar to the overall plot when exposure is assigned at the age of reported births. Therefore, our analysis prioritized the accuracy of exposure information by retrospectively assign exposure changes at each age an additional birth was reported during study follow-up, rather than the age the follow-up information was received.

Adjusted cumulative incidence plot (Supplement Figure 4)

We used an inverse probability of exposure approach to calculate the adjusted cumulative incidence of breast cancer for the time since most recent childbirth categories (nulliparous; 0-2.9, 3-6.9, 7-14.9, 15-24.9, and 25+ years) (Cole and Hernán 2004). The time scale for the risk plots was attained age. We fit a multinomial logistic regression to estimate the probability of being in a time since most recent childbirth category given the total number of births (0-10). Stabilized weights were calculated as the inverse of the conditional probabilities of exposure, rescaled by the overall proportion of participants in each time since most recent childbirth category to reduce variability of weights across groups (49). The adjusted cumulative incidence was calculated as  $1-S(t)$ , where  $S(t)$  is the weighted Kaplan-Meier estimator for each time since most recent birth category.

#### Adjusted cumulative incidence standardized to a common age interval (Supplement Figure 5)

The adjusted cumulative incidence plot shown in Supplement Figure 4 provides the cumulative incidence for each exposure category by attained age. This does not allow for the direct comparison of risk between exposure groups at a given age because the cumulative incidence is additive across a longer time period for risk estimates for exposure categories that start at younger ages (e.g. 0-2.9 years since most recent birth), than for exposure categories that have initial events at older ages (e.g. 25+ years since most recent birth). Therefore, we standardized the survival probability to a common age interval where events occurred among all time since most recent birth categories. The common interval starts at age 41.5 at which age the survival probability was set to 1. The standardized survival probability was achieved by dividing the survival probability at all ages between 41.5 and 50 by the survival probability at 41.5. The standardized incidence is calculated as  $1 - \text{the standardized survival probability}$ . The resulting plot allows comparison of cumulative incidence across time since most recent birth categories.

**Supplement Figure 1.** Flowchart of exclusions from analysis based on analysis eligibility criteria and censoring during follow-up.

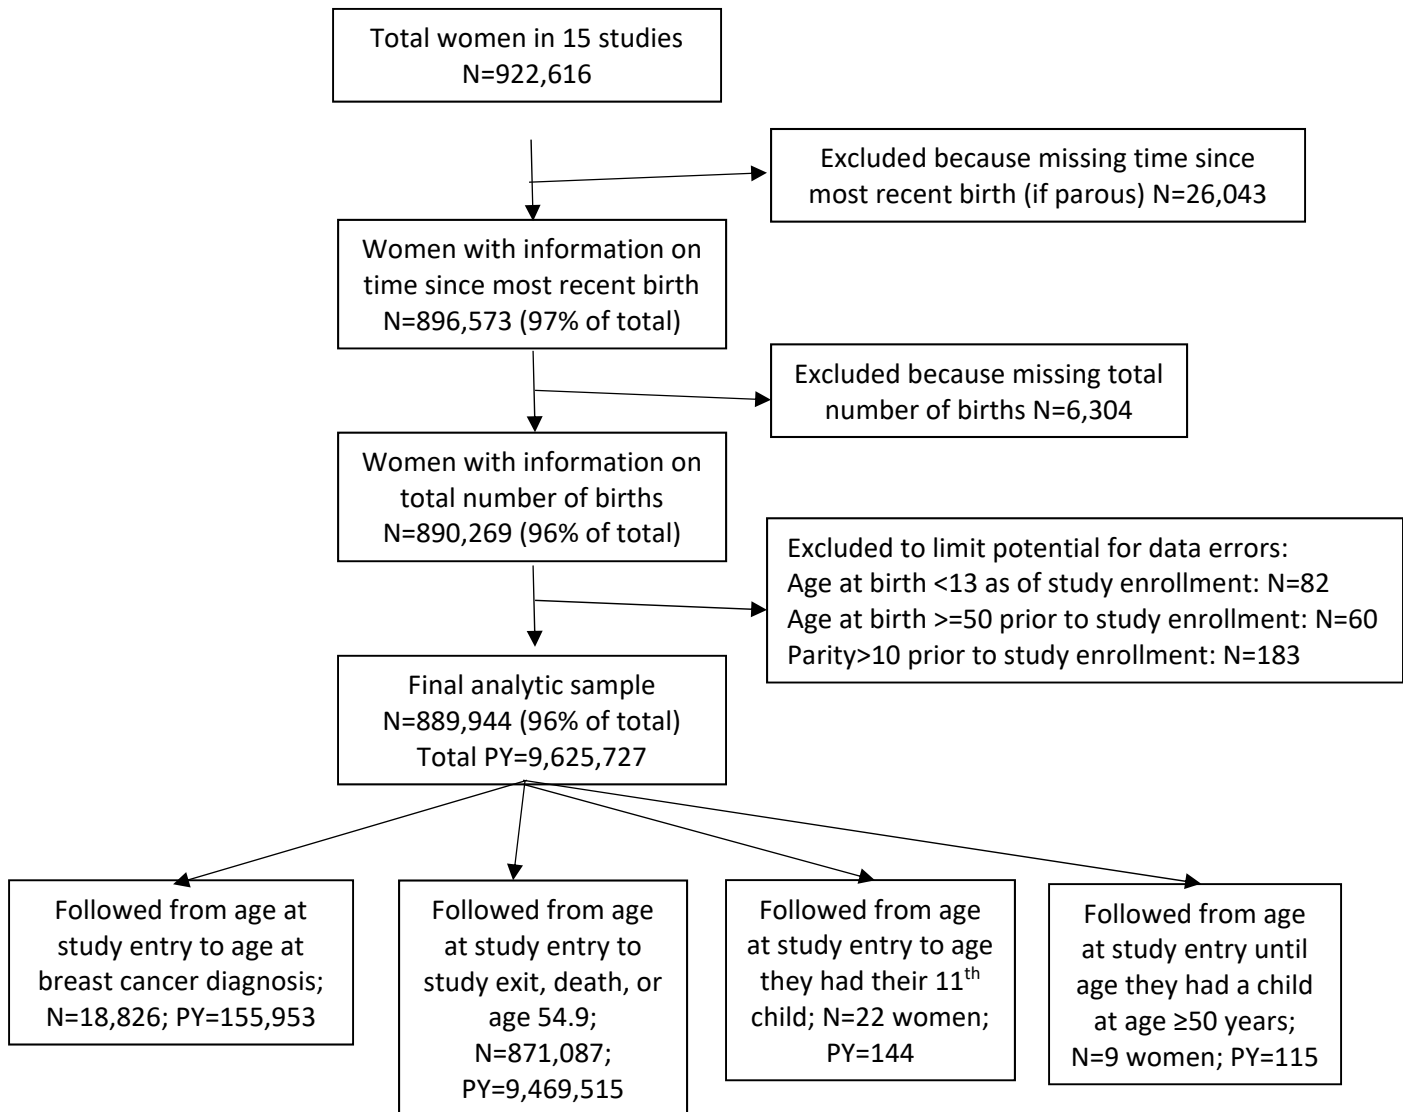



**Supplement Figure 2.** Forest plot of the association between time since most recent birth and breast cancer risk by study, adjusted for parity (continuous). Cochran's  $Q$ , degrees of freedom (df),  $p$ , and  $I^2$  for each category shown below (43).

| Time since birth | HR (95% CI)       | Q statistic | df | P-value | $I^2$ (%) |
|------------------|-------------------|-------------|----|---------|-----------|
| 0-4.9            | 1.36 (1.11, 1.67) | 22.14       | 14 | 0.08    | 41.29%    |
| 5-9.9            | 1.34 (1.23, 1.46) | 12.49       | 15 | 0.64    | <0%       |
| 10-14.9          | 1.20 (1.10, 1.31) | 16.22       | 15 | 0.37    | 13.68%    |
| 15+              | 1.03 (0.97, 1.09) | 12.33       | 15 | 0.65    | <0%       |

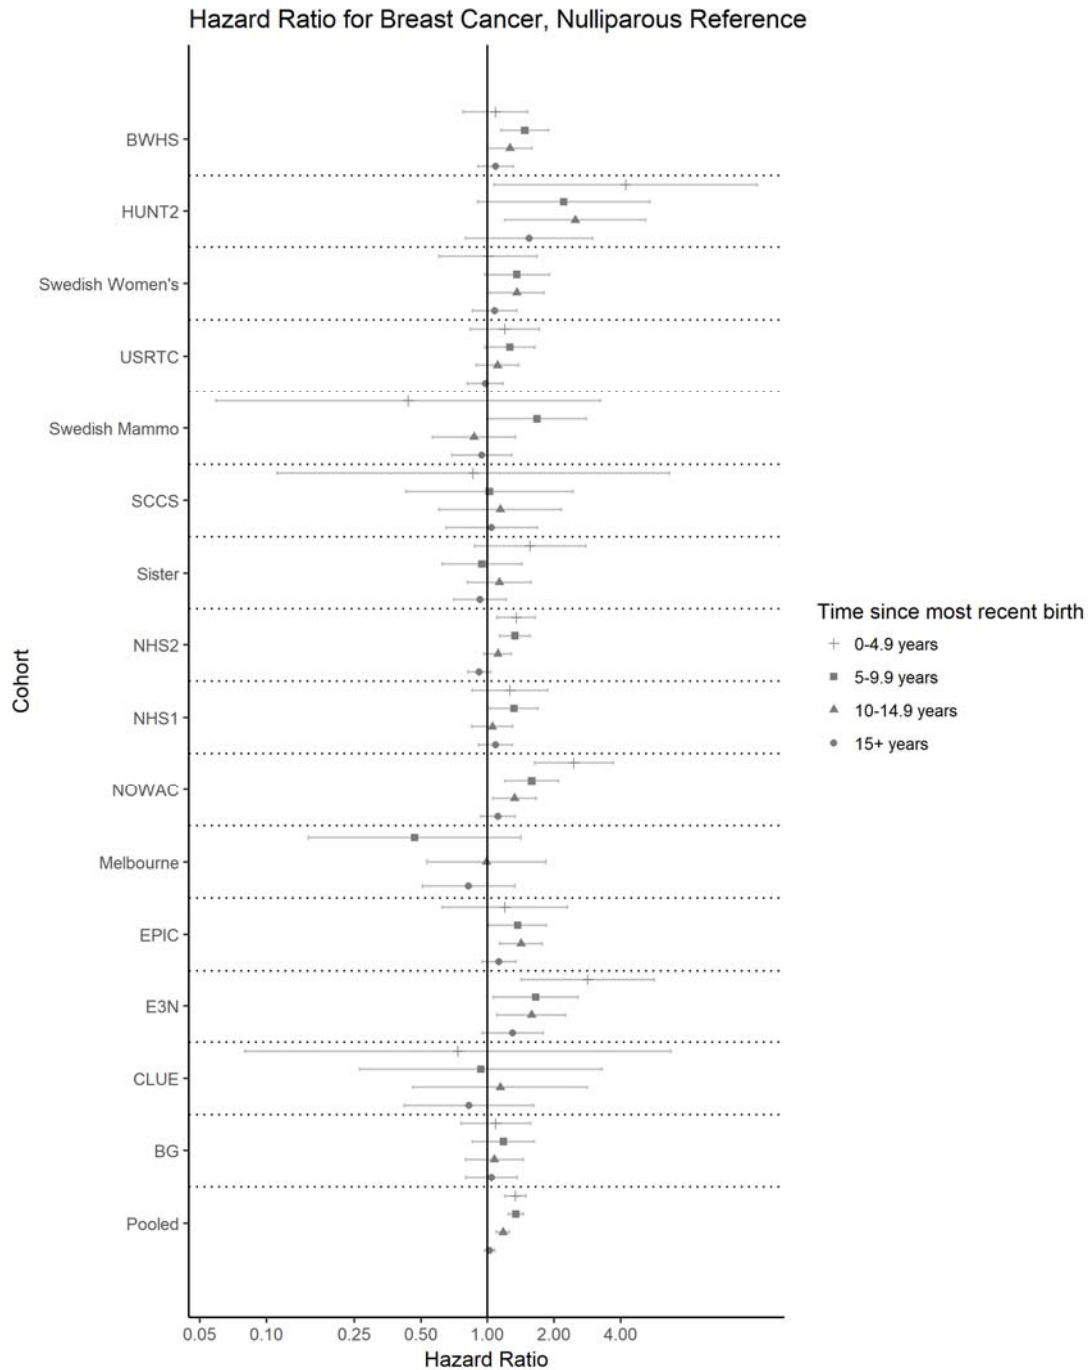

**Supplement Figure 3.** Directed acyclic graph drawn using DAGitty (<http://dagitty.net/>). The minimal sufficient adjustment set to estimate the total or direct effect of time since most recent birth on breast cancer risk includes adjustment for breastfeeding and parity. Pink circles indicate ancestors of exposure *and* outcome, grey circles indicate unobserved (latent) variables, white circles indicate adjusted variables, the green circle is the primary exposure, and the blue circle is the outcome. Any biasing paths would be shown in red.

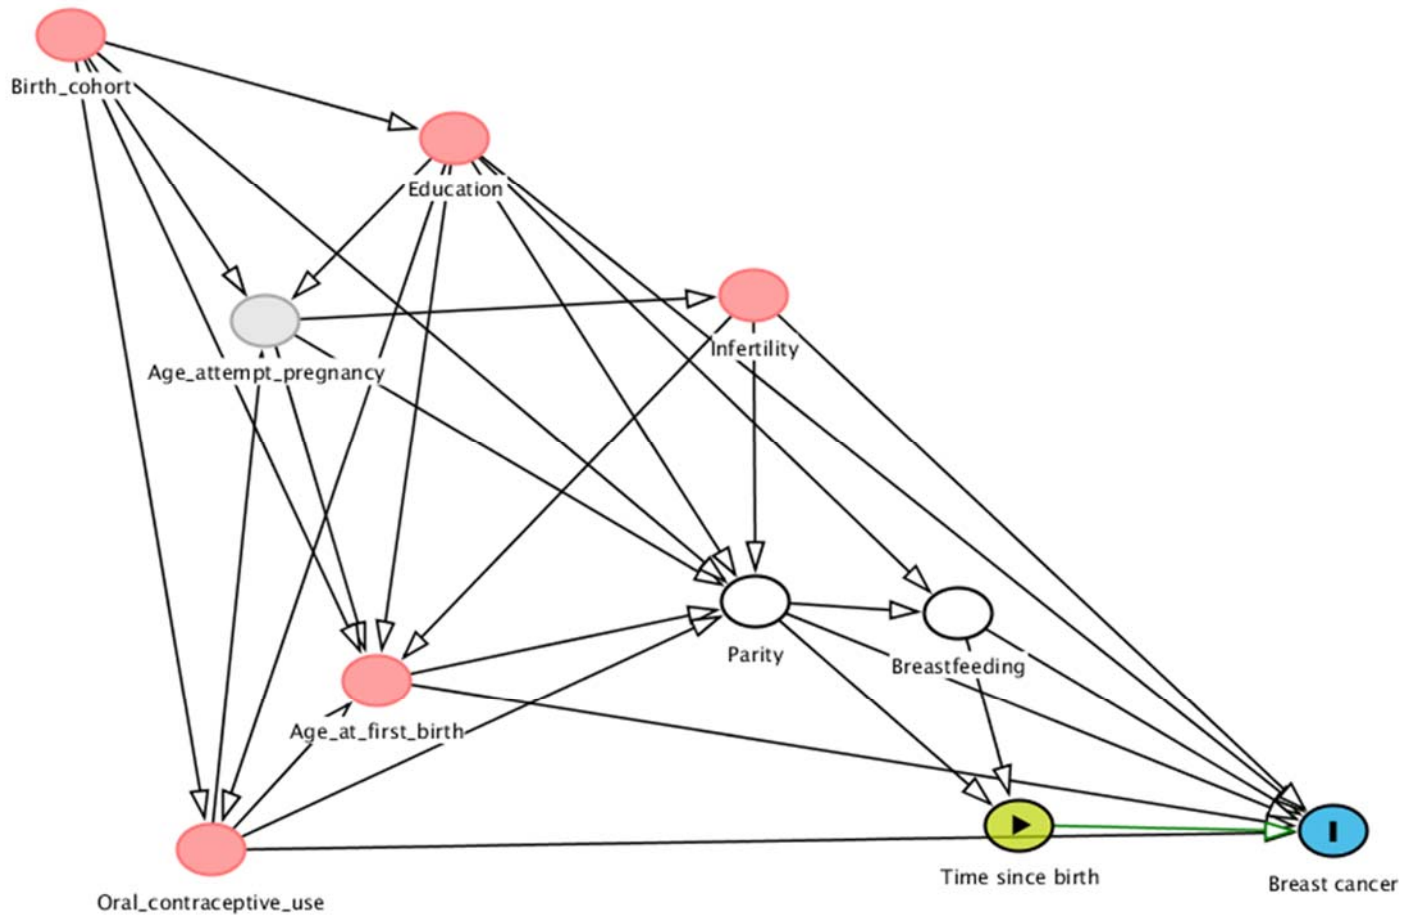

**Supplement Figure 4.** Cumulative incidence for breast cancer according to time since most recent birth, weighted by parity.

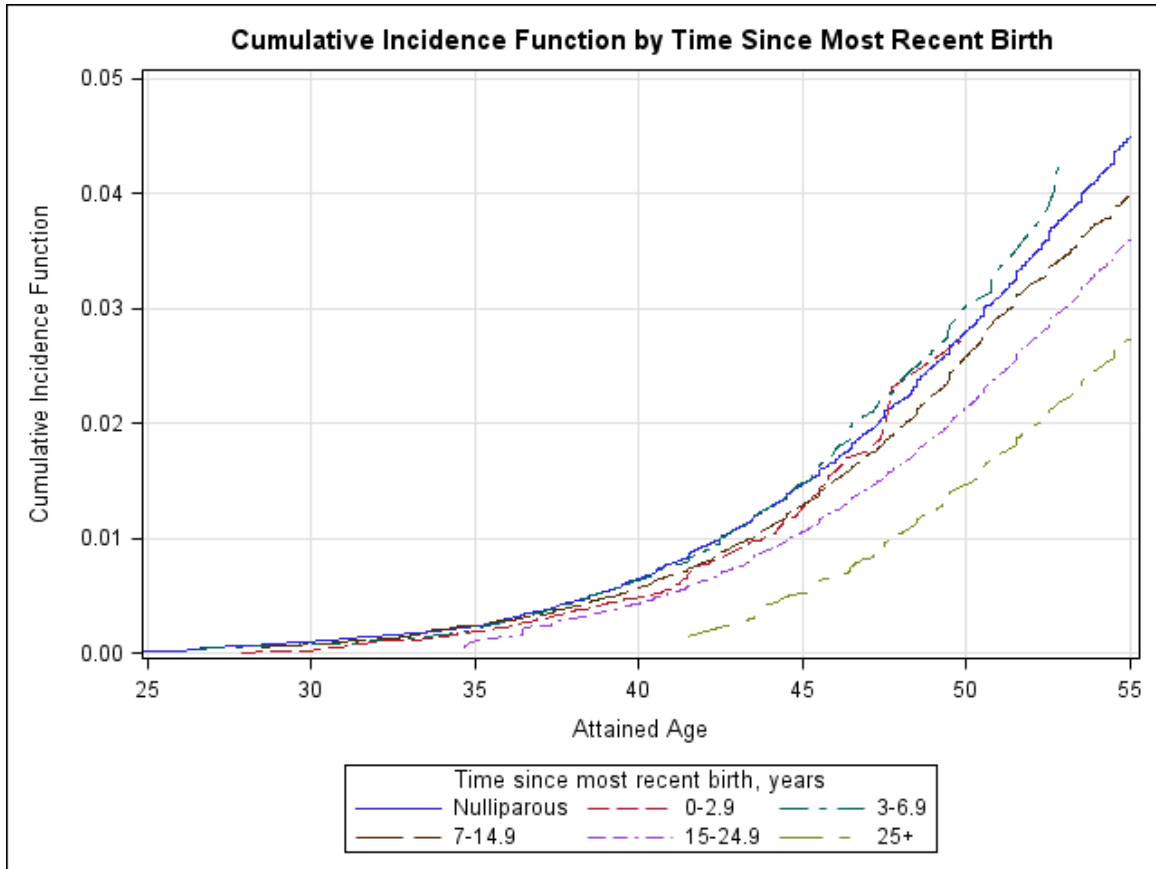

**Supplement Figure 5.** Cumulative incidence for breast cancer according to time since most recent birth, weighted by parity and standardized to a common age interval.

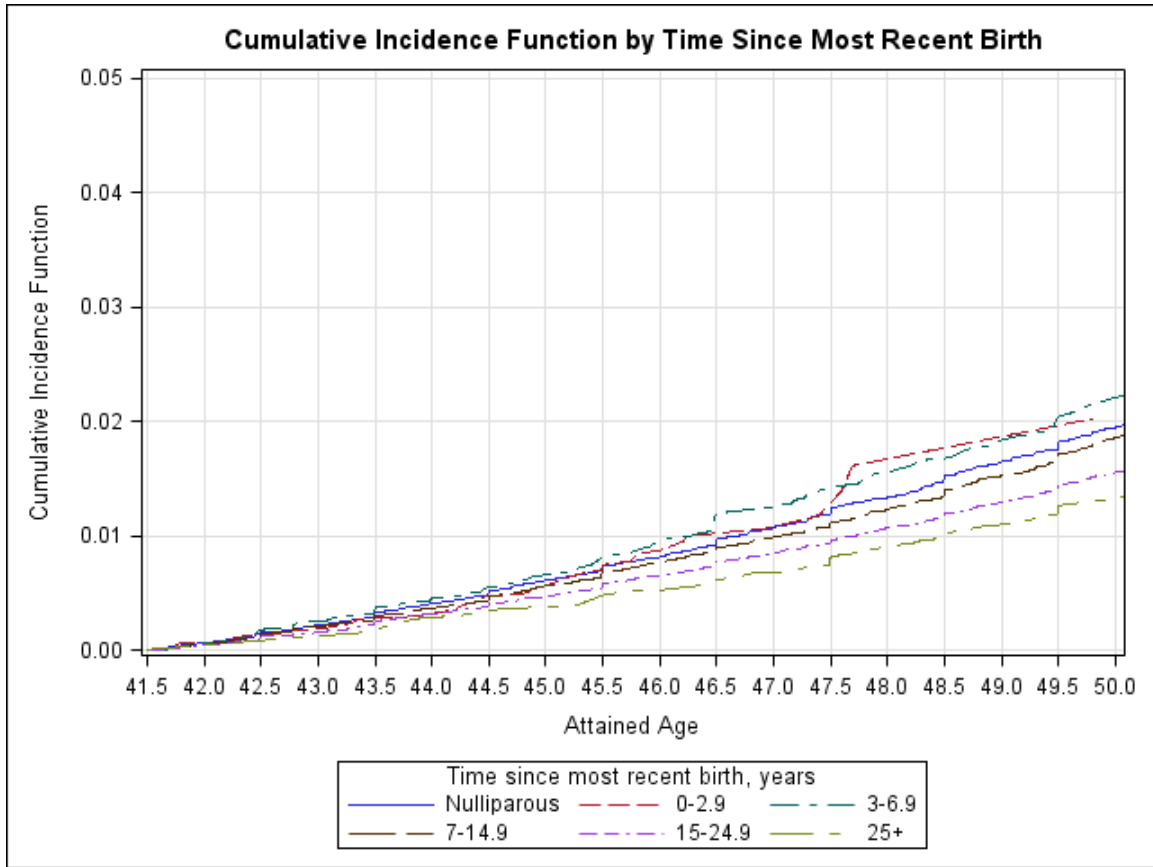

**Supplement Figure 6.** Hazard ratio (HR) for breast cancer risk according to years since most recent birth and stratified according to family history of breast cancer (Panels A and B). HRs are adjusted for attained age, study, and parity and nulliparous women are the reference group. The dashed curves correspond to 95% confidence intervals. The vertical lines represent the quadratic spline knots at 6.1, 13.3, 18.4, 23.3, 29.3 years after birth. Likelihood ratio tests for models with and without interaction terms for time since most recent birth and family history indicated a statistically significant interaction ( $P=0.044$ ).

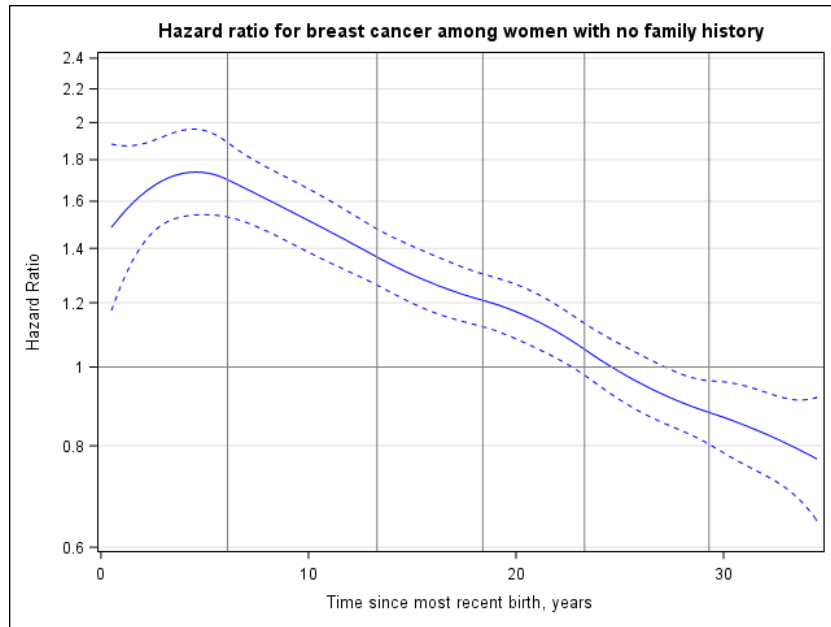

**S6A.** For women who did not have a family history of breast cancer, the peak HR of 1.74 (CI: 1.54, 1.96) occurred 4.6 years after last birth and the crossover occurred at 24.6 (22.9, 27.4) years before reaching a HR of 0.77 (CI: 0.65, 0.92) at 34.5 years compared with nulliparous women without a family history.

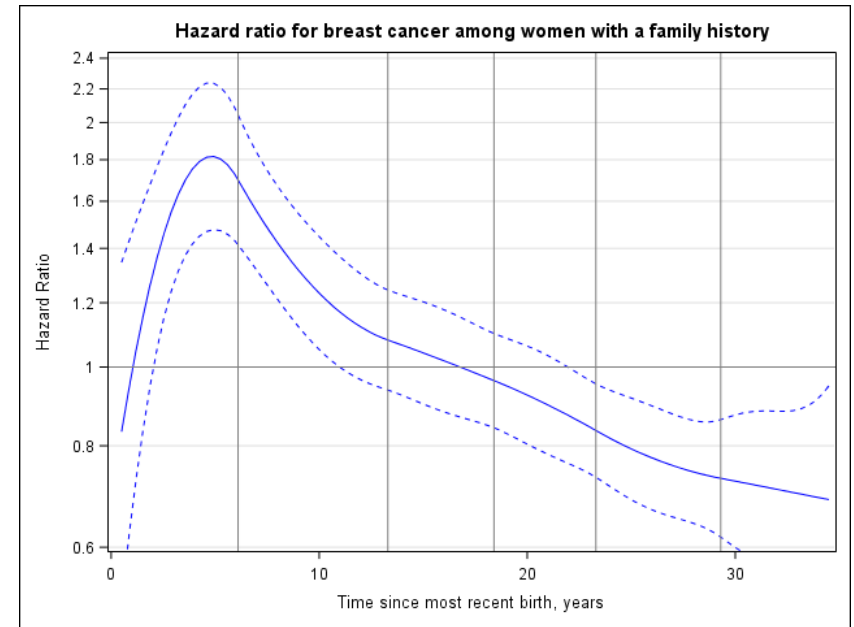

**S6B.** In women with a family history of breast cancer, breast cancer risk peaked at a HR of 1.82 (CI: 1.48, 2.24) at 4.9 years, crossed over 1 at 16.8 (11.0, 22.3) years, and reached its lowest observed point (HR=0.69; 95% CI: 0.50, 0.95) at 34.5 years after birth compared with nulliparous women with a family history of breast cancer.

**Supplement Figure 7.** Hazard ratio (HR) for breast cancer risk according to years since most recent birth and stratified by breastfeeding history. Nulliparous women are the reference group and HRs are adjusted for attained age, study, and parity. The dashed curves correspond to 95% confidence intervals. The vertical lines represent the quadratic spline knots at 6.1, 13.3, 18.4, 23.3, 29.3 years after birth. Likelihood ratio tests did not indicate a statistically significant interaction with breastfeeding ( $P=0.38$ ). Women who breastfed had a peak HR of 1.92 (1.70, 2.16) for breast cancer at 4.9 years after last birth with a gradual cross-over to an inverse association at 24.3 years after last birth. For those who did not breastfeed, the peak HR of 1.60 (1.24, 2.05) occurred 3.6 years after last birth and the cross-over occurred at 27.4 years after last birth. As an approximation of the 95% CI for the crossover point, for women who breastfed, the lower bound crosses at 22.9 years and the upper bound crosses at 26.7 years since most recent birth. For women who did not breastfeed, the lower bound crosses at 23.3 and the upper bound crosses at 33.1 years since most recent birth.

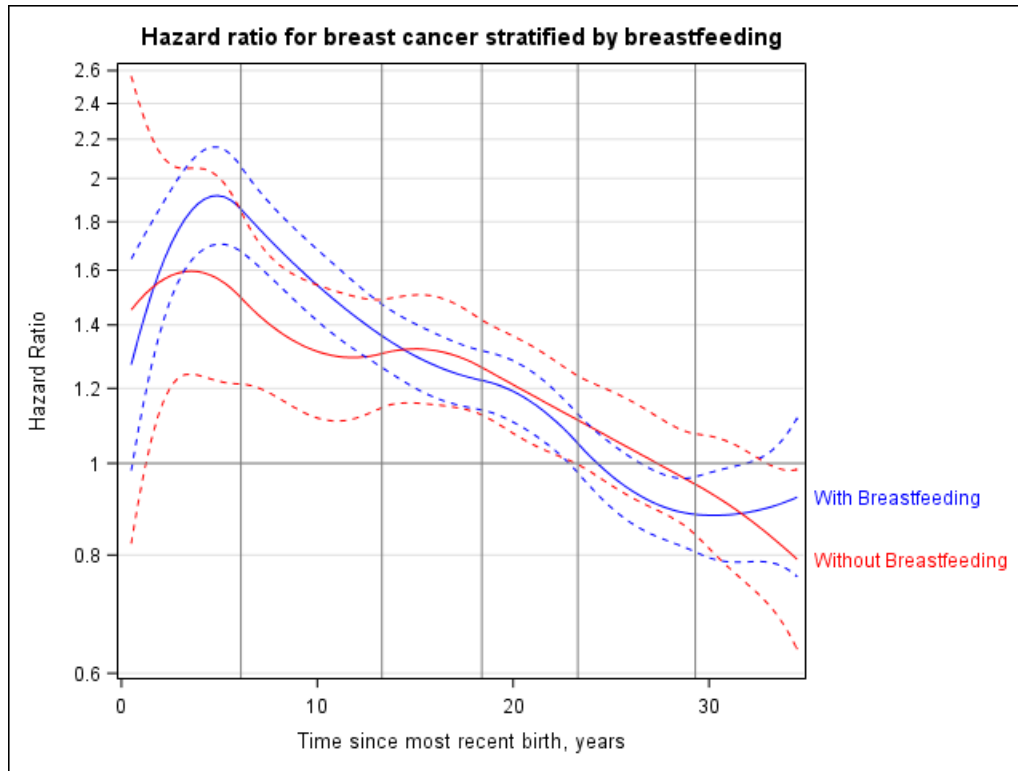

**Supplement Figure 8.** Hazard ratio (HR) for risk of ER-positive and ER-negative breast cancer risk according to years since most recent birth. Nulliparous women are the reference group and HRs are adjusted for attained age, study, parity (continuous), and breastfeeding (ever/never). The dashed curves correspond to 95% confidence intervals. The vertical lines represent the quadratic spline knots at 6.1, 13.3, 18.4, 23.3, 29.3 years after birth. Interaction terms for time since most recent birth and ER status indicated a statistically significant interaction ( $P < 0.001$ ). ER-negative breast cancer risk peaked at HR=1.98 (1.48, 2.65) and did not crossover to an inverse association during follow-up. ER-positive breast cancer risk peaked at HR=1.91 (1.63, 2.25) at 5.3 years and crossed over to an inverse association at 25.3 years after birth (lower bound of the CI crossed over null at 23.3 years).

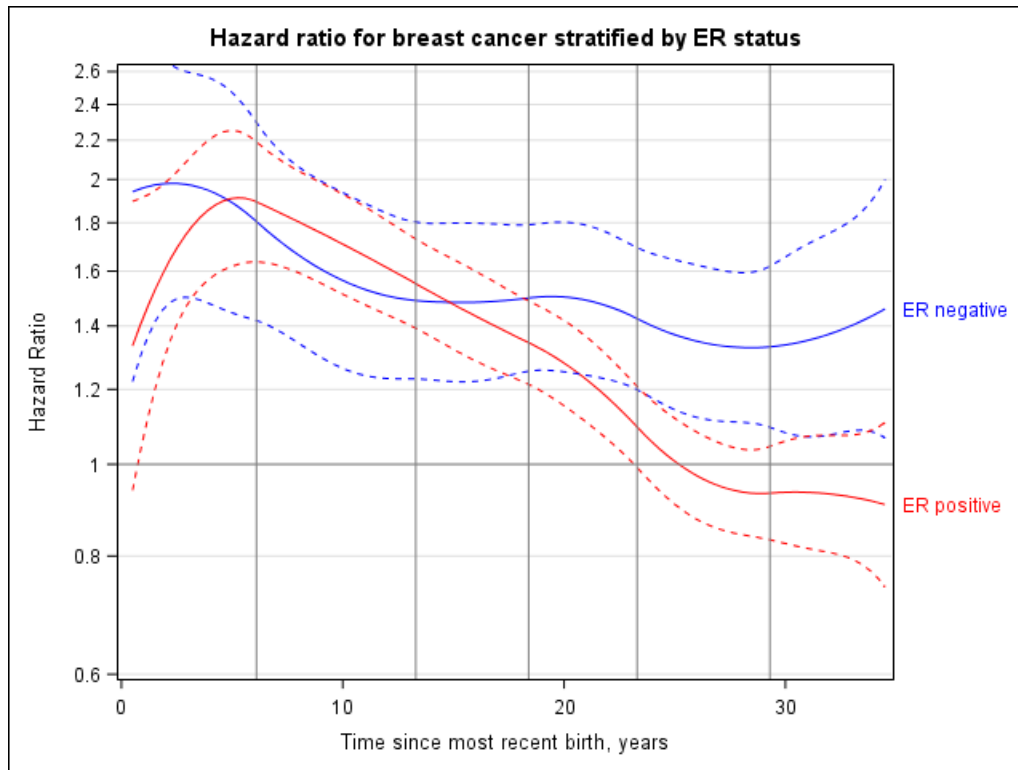

**Supplement Table 1.** Cohort-specific participant characteristics at study enrollment.

| <i>Cohort study</i>                                                                          | <i>Cohort acronym</i> | <i>Country</i>       | <i>No women &lt;55 years</i> | <i>Enrollment years</i> | <i>Years of follow-up, Mean (SD)</i> | <i>No. incident breast cancers</i> | <i>Age at enrollment, years Mean (SD)</i> | <i>No. of Follow-up rounds including baseline</i> | <i>% Nulliparous</i> | <i>Age at first birth, years Mean (SD)</i> | <i>Age at last birth, years Mean (SD)</i> | <i>Number of births, Mean (SD)</i> |
|----------------------------------------------------------------------------------------------|-----------------------|----------------------|------------------------------|-------------------------|--------------------------------------|------------------------------------|-------------------------------------------|---------------------------------------------------|----------------------|--------------------------------------------|-------------------------------------------|------------------------------------|
| Black Women's Health Study (21)                                                              | BWHS                  | United States (U.S.) | 51,068                       | 1995                    | 12.6 (5.6)                           | 1,270                              | 37.1(8.6)                                 | 9                                                 | 37.1%                | 22.4 (5.1)                                 | 28.0 (6.0)                                | 1.3 (1.3)                          |
| Campaign against Cancer and Heart Disease (25)                                               | CLUEII                | U.S.A.               | 4,039                        | 1989                    | 11.2 (5.6)                           | 93                                 | 39.7(9.6)                                 | 6                                                 | 27.5%                | 22.7 (4.3)                                 | 27.0 (5.1)                                | 1.6 (1.4)                          |
| European Prospective Investigation into Cancer and Nutrition (30)*                           | EPIC                  | Europe               | 126,043                      | 1991-2000               | 7.4 (4.1)                            | 1,758                              | 44.2(8.2)                                 | 1                                                 | 22.8%                | 24.8 (4.4)                                 | 29.0 (4.9)                                | 1.7 (1.2)                          |
| Etude Epidémiologique auprès de femmes de la Mutuelle Générale de l'Education Nationale (22) | E3N                   | France               | 59,126                       | 1989-1991               | 8.1 (4.2)                            | 1,538                              | 46.4(4.2)                                 | 8                                                 | 3.1%                 | 24.9 (4.0)                                 | 29.0 (4.6)                                | 2.1 (0.9)                          |
| Generations Study (33)                                                                       | GS                    | United Kingdom       | 72,050                       | 2003-2012               | 6.8 (2.7)                            | 924                                | 39.8(9.5)                                 | 2                                                 | 35.1%                | 27.5 (4.8)                                 | 31.3 (4.7)                                | 1.3 (1.2)                          |
| Helseundersøkelsen i Nord-Trøndelag (28)                                                     | HUNT2                 | Norway               | 20,533                       | 1995-1997               | 10.1 (4.1)                           | 208                                | 39.0(9.6)                                 | 1                                                 | 16.4%                | 22.8 (3.9)                                 | 28.0 (4.8)                                | 2.0 (1.2)                          |
| Melbourne Collaborative Cohort Study (26)                                                    | MCCS                  | Australia            | 12,020                       | 1990-1994               | 7.3 (4.4)                            | 227                                | 47.5(4.4)                                 | 3                                                 | 16.6%                | 24.9 (4.8)                                 | 30.1 (4.9)                                | 2.2 (1.4)                          |
| Norwegian Women and Cancer Study (29)                                                        | NOWAC                 | Norway               | 117,607                      | 1991-2007               | 9.0 (5.8)                            | 2,123                              | 45.7(6.0)                                 | 3                                                 | 10.0%                | 24.0 (4.5)                                 | 29.5 (5.2)                                | 2.1 (1.1)                          |
| Nurses' Health Study (27)                                                                    | NHS                   | U.S.A.               | 114,860                      | 1976                    | 12.2 (7.1)                           | 2,680                              | 42.6(7.1)                                 | 16                                                | 6.4%                 | 25.1 (3.3)                                 | 30.7 (4.7)                                | 2.7 (1.6)                          |



|                                                                                                                                                                                             |        |        |                |           |                       |               |                  |    |              |                       |                       |                      |
|---------------------------------------------------------------------------------------------------------------------------------------------------------------------------------------------|--------|--------|----------------|-----------|-----------------------|---------------|------------------|----|--------------|-----------------------|-----------------------|----------------------|
| Nurses' Health Study II (23)                                                                                                                                                                | NHS II | U.S.A. | 115,908        | 1989      | 18.7<br>(3.7)         | 3,758         | 34.8(4.7)        | 12 | 28.8%        | 25.5<br>(4.1)         | 30.4<br>(4.6)         | 1.5<br>(1.2)         |
| Sister Study (34)                                                                                                                                                                           | SIS    | U.S.A. | 24,022         | 2003-2009 | 4.7<br>(2.5)          | 678           | 47.9(4.9)        | 3  | 21.6%        | 25.9<br>(5.6)         | 30.4<br>(5.6)         | 1.7<br>(1.2)         |
| Southern Community Cohort Study (32)                                                                                                                                                        | SCCS   | U.S.A. | 29,934         | 2002-2009 | 5.1<br>(2.4)          | 230           | 47.3(4.2)        | 2  | 11.3%        | 20.4<br>(4.8)         | 27.5<br>(6.2)         | 2.4<br>(1.6)         |
| Sweden Women's Lifestyle and Health Study (31)                                                                                                                                              | WLHS   | Sweden | 49,003         | 1991-1992 | 14.4<br>(5.3)         | 1,192         | 39.7(5.8)        | 2  | 12.4%        | 23.8<br>(4.5)         | 29.4<br>(5.2)         | 2.0<br>(1.1)         |
| Swedish Mammography Cohort (35)                                                                                                                                                             | SMC    | Sweden | 34,049         | 1987-1990 | 8.3<br>(4.3)          | 649           | 46.6(4.3)        | 2  | 9.3%         | 23.7<br>(4.5)         | 29.0<br>(5.1)         | 2.1<br>(1.1)         |
| United States Radiologic Technologist Cohort (24)                                                                                                                                           | USRTC  | U.S.A. | 59,682         | 1983-1998 | 14.5<br>(5.6)         | 1,498         | 36.7(7.3)        | 3  | 30.0%        | 25.2<br>(3.7)         | 29.6<br>(4.3)         | 1.4<br>(1.3)         |
| <i>Total</i>                                                                                                                                                                                |        |        | <i>889,944</i> |           | <i>10.8<br/>(6.4)</i> | <i>18,826</i> | <i>41.8(8.0)</i> |    | <i>19.0%</i> | <i>24.6<br/>(4.5)</i> | <i>29.6<br/>(5.1)</i> | <i>1.9<br/>(1.3)</i> |
| * Data from EPIC Sweden are excluded from this analysis due to data governance rules and data from EPIC-Norway and EPIC-France because they joined the collaboration as individual studies. |        |        |                |           |                       |               |                  |    |              |                       |                       |                      |

**Supplement Table 2.** Multivariable hazard ratio (HR) and 95% confidence intervals (CI) for the association between time since most recent birth and ER-negative breast cancer risk according to breastfeeding history .

| Time since most recent birth, years | BREASTFED    |      |               |                        | NEVER BREASTFED |      |               |                        |
|-------------------------------------|--------------|------|---------------|------------------------|-----------------|------|---------------|------------------------|
|                                     | Person-years | % PY | Total cases N | All Cases HR (95% CI)* | Person-years    | % PY | Total cases N | All Cases HR (95% CI)* |
| Nulliparous                         | 1,402,240    | 21.9 | 381           | 1                      | 1,402,240       | 51.2 | 381           | 1                      |
| 0-2.9                               | 261,321      | 4.1  | 43            | 1.55 (1.07, 2.26)      | 39,555          | 1.4  | 4             | 0.93 (0.34, 2.57)      |
| 3-4.9                               | 204,994      | 3.2  | 38            | 1.47 (1.01, 2.15)      | 33,566          | 1.2  | 14            | 2.95 (1.65, 5.30)      |
| 5-9.9                               | 701,759      | 11.0 | 159           | 1.41 (1.11, 1.79)      | 130,666         | 4.8  | 24            | 0.94 (0.59, 1.51)      |
| 10-14.9                             | 1,009,851    | 15.8 | 268           | 1.26 (1.02, 1.55)      | 221,199         | 8.1  | 80            | 1.37 (0.99, 1.89)      |
| 15-19.9                             | 1,180,668    | 18.4 | 369           | 1.23 (1.01, 1.50)      | 309,477         | 11.3 | 147           | 1.50 (1.14, 1.98)      |
| 20-24.9                             | 1,005,833    | 15.7 | 360           | 1.26 (1.04, 1.52)      | 321,436         | 11.7 | 170           | 1.46 (1.13, 1.88)      |
| 25-29.9                             | 512,452      | 8.0  | 192           | 1.26 (1.02, 1.56)      | 205,858         | 7.5  | 116           | 1.42 (1.09, 1.85)      |
| 30+                                 | 122,644      | 1.9  | 62            | 1.68 (1.25, 2.25)      | 74,008          | 2.7  | 40            | 1.26 (0.88, 1.81)      |
| <b>Parity</b>                       |              |      |               |                        |                 |      |               |                        |
| Per birth                           | 6,401,762    | 100  | 1,872         | 0.89 (0.84, 0.94)      | 2,738,007       | 100  | 976           | 0.92 (0.85, 1.00)      |

\* Women in 12 studies with available information on breastfeeding status, adjusted for age as the time-scale, study and parity.

**Supplement Table 3.** Multivariable hazard ratios (HR) and 95% confidence intervals (CI) for the association between time since last birth and breast cancer risk overall, and according to estrogen receptor (ER) status, among parous women.

| Time since most recent birth, years                                                                                                                                                                         | Person-years (PY) | Total cases | HR (95% CI)*      | HR (95% CI) <sup>†</sup> | ER+ cases | HR (95% CI) <sup>‡</sup> | ER-cases | HR (95% CI) <sup>‡</sup> |
|-------------------------------------------------------------------------------------------------------------------------------------------------------------------------------------------------------------|-------------------|-------------|-------------------|--------------------------|-----------|--------------------------|----------|--------------------------|
| 0-2.9                                                                                                                                                                                                       | 300,939           | 166         | 0.94 (0.79,1.12)  | 0.94 (0.79, 1.13)        | 76        | 0.90 (0.69, 1.17)        | 47       | 1.02 (0.71, 1.46)        |
| 3-4.9                                                                                                                                                                                                       | 238,650           | 254         | 1.34 (1.17,1.54)  | 1.35 (1.17,1.55)         | 115       | 1.26 (1.03,1.55)         | 52       | 1.25 (0.91, 1.72)        |
| 5-9.9                                                                                                                                                                                                       | 833,363           | 1,126       | 1.14 (1.05,1.23)  | 1.14 (1.06, 1.23)        | 532       | 1.09 (0.98, 1.22)        | 183      | 1.02 (0.85, 1.24)        |
| 10-14.9                                                                                                                                                                                                     | 1,232,769         | 2,264       | 1                 | 1                        | 1,150     | 1                        | 348      | 1                        |
| 15-19.9                                                                                                                                                                                                     | 1,492,803         | 3,425       | 0.92 (0.87,0.98)  | 0.92 (0.87, 0.97)        | 1,746     | 0.90 (0.83, 0.97)        | 516      | 1.00 (0.86, 1.15)        |
| 20-24.9                                                                                                                                                                                                     | 1,329,779         | 3,401       | 0.84 (0.79,0.89)  | 0.83 (0.79, 0.88)        | 1,681     | 0.77 (0.71, 0.84)        | 530      | 0.99 (0.85, 1.15)        |
| 25-29.9                                                                                                                                                                                                     | 719,517           | 1,845       | 0.74 (0.69,0.79)  | 0.73 (0.68, 0.79)        | 909       | 0.66 (0.60, 0.73)        | 308      | 0.97 (0.81, 1.16)        |
| 30+                                                                                                                                                                                                         | 196,923           | 539         | 0.71 (0.64,0.79)  | 0.71 (0.64, 0.79)        | 271       | 0.64 (0.55, 0.75)        | 102      | 1.03 (0.80, 1.33)        |
| <b>Parity</b>                                                                                                                                                                                               |                   |             |                   |                          |           |                          |          |                          |
| Per birth                                                                                                                                                                                                   | 6,344,743         | 13,020      | 0.87 (0.86, 0.89) | 0.88 (0.86, 0.89)        | 6,480     | 0.85 (0.83, 0.87)        | 2,086    | 0.90 (0.86, 0.94)        |
| <b>Breastfeeding</b>                                                                                                                                                                                        |                   |             |                   |                          |           |                          |          |                          |
| Never                                                                                                                                                                                                       | 1,337,537         | 2,924       | ---               | 1                        |           | 1                        |          | 1                        |
| Ever                                                                                                                                                                                                        | 5,007,206         | 10,096      | ---               | 0.96 (0.92, 1.00)        | 6,480     | 1.00 (0.93, 1.06)        | 2,086    | 0.89 (0.80, 0.99)        |
| * Parous women in 12 studies with available information on breastfeeding status; HRs are adjusted for age as the time-scale, study, and parity.                                                             |                   |             |                   |                          |           |                          |          |                          |
| † Parous women in 12 studies with available information on breastfeeding status; HRs adjusted for age as the time-scale, study, parity and breast-feeding status.                                           |                   |             |                   |                          |           |                          |          |                          |
| ‡ ER status was available for 8,566 parous women in the 12 studies with available information on breastfeeding status. HRs are adjusted for age as the time-scale, study, parity and breast-feeding status. |                   |             |                   |                          |           |                          |          |                          |

**Supplement Table 4.** Multivariable hazard ratio (HR) and 95% confidence intervals (CI) for the association between time since most recent birth and breast cancer risk according to stage at diagnosis.

| <b>Time since most recent birth, years</b> | <b>Person-years</b> | <b>% PY</b> | <b>Total cases N</b> | <b>All Cases HR (95% CI)*</b> | <b>All Cases HR (95% CI)†</b> | <b>Stage 1-3 cases‡</b> | <b>HR (95% CI)‡</b> |
|--------------------------------------------|---------------------|-------------|----------------------|-------------------------------|-------------------------------|-------------------------|---------------------|
| Nulliparous                                | 1,408,542           | 18.2%       | 2,572                | 1                             | 1                             | 1,428                   | 1                   |
| 0-2.9                                      | 300,939             | 3.9%        | 166                  | 1.19 (1.00, 1.41)             | 1.23 (1.03, 1.47)             | 110                     | 1.29 (1.03,1.62)    |
| 3-4.9                                      | 238,650             | 3.1%        | 254                  | 1.71 (1.48, 1.97)             | 1.77 (1.53, 2.05)             | 157                     | 1.78 (1.47,2.16)    |
| 5-9.9                                      | 833,363             | 10.7%       | 1,126                | 1.46 (1.33, 1.59)             | 1.51 (1.37, 1.66)             | 655                     | 1.47 (1.29,1.66)    |
| 10-14.9                                    | 1,232,769           | 15.9%       | 2,264                | 1.30 (1.21, 1.40)             | 1.35 (1.24, 1.46)             | 1,323                   | 1.38 (1.24,1.53)    |
| 15-19.9                                    | 1,492,803           | 19.2%       | 3,425                | 1.21 (1.13, 1.30)             | 1.26 (1.17, 1.35)             | 1,958                   | 1.31 (1.19,1.45)    |
| 20-24.9                                    | 1,329,779           | 17.1%       | 3,401                | 1.11 (1.04, 1.19)             | 1.15 (1.07, 1.23)             | 1,805                   | 1.18 (1.07,1.29)    |
| 25-29.9                                    | 719,517             | 9.3%        | 1,845                | 0.98 (0.91, 1.05)             | 1.01 (0.94, 1.09)             | 951                     | 1.05 (0.95,1.16)    |
| 30+                                        | 196,923             | 2.5%        | 539                  | 0.96 (0.87, 1.06)             | 0.98 (0.89, 1.09)             | 284                     | 1.01 (0.88,1.17)    |
| <b>Parity</b>                              |                     |             |                      |                               |                               |                         |                     |
| Per birth                                  | 7,753,322           | 100%        | 15,592               | 0.88 (0.86, 0.89)             | 0.88 (0.86, 0.90)             | 8,671                   | 0.89 (0.87, 0.91)   |
| <b>Breastfeeding</b>                       |                     |             |                      |                               |                               |                         |                     |
| Never                                      | 5,007,240           | 64.6        | 10,096               | ---                           | 1                             | 5,582                   | 1                   |
| Ever                                       | 2,746,081           | 35.4        | 5,496                | ---                           | 0.95 (0.91, 1.00)             | 3,089                   | 0.95 (0.90, 1.01)   |

\* Records from 12 studies with available information on breastfeeding status; HRs are adjusted for age as the time-scale, study and parity.

† Records from 12 studies with available information on breastfeeding status; HRs are adjusted for age as the time-scale, study, parity and breast-feeding status.

‡ Stage information was available for 11,078 women in the 12 studies with available information on breastfeeding status. HRs are adjusted for age as the time-scale, study, parity and breast-feeding status.
